# Supplementary material for: Monolayer CoMoS Catalysts on Hierarchically Porous Alumina Spheres as Bifunctional Nanomaterials for Hydrodesulfurization and Energy Storage Applications
Source: MDPI journal article supplement (doi:10.3390/catal12080913), 2022-08-18
Supplement: s1 [file s1]

# Monolayer CoMoS Catalysts on Hierarchically Porous Alumina Spheres as Bifunctional Nanomaterials for Hydrodesulfurization and Energy Storage Applications

Anabel D. Delgado <sup>1</sup>, Lorena Álvarez-Contreras <sup>1,\*</sup>, Karen A. Beltrán <sup>1</sup>, Noé Arjona <sup>2</sup>, Minerva Guerra-Balcázar <sup>3</sup>, José Béjar <sup>1</sup> and Alfredo Aguilar-Elguezabal <sup>1</sup>

<sup>1</sup> Centro de Investigación en Materiales Avanzados S.C. (CIMAV), Miguel de Cervantes No. 120, Complejo Industrial Chihuahua, Chihuahua C.P. 31136, Mexico

<sup>2</sup> Centro de Investigación y Desarrollo Tecnológico en Electroquímica S.C., Pedro Escobedo, Querétaro C.P. 76703, Mexico

<sup>3</sup> Facultad de Ingeniería, División de Investigación y Posgrado, Universidad Autónoma de Querétaro, Querétaro C.P. 76010, Mexico

\* Correspondence: lorena.alvarez@cimav.edu.mx

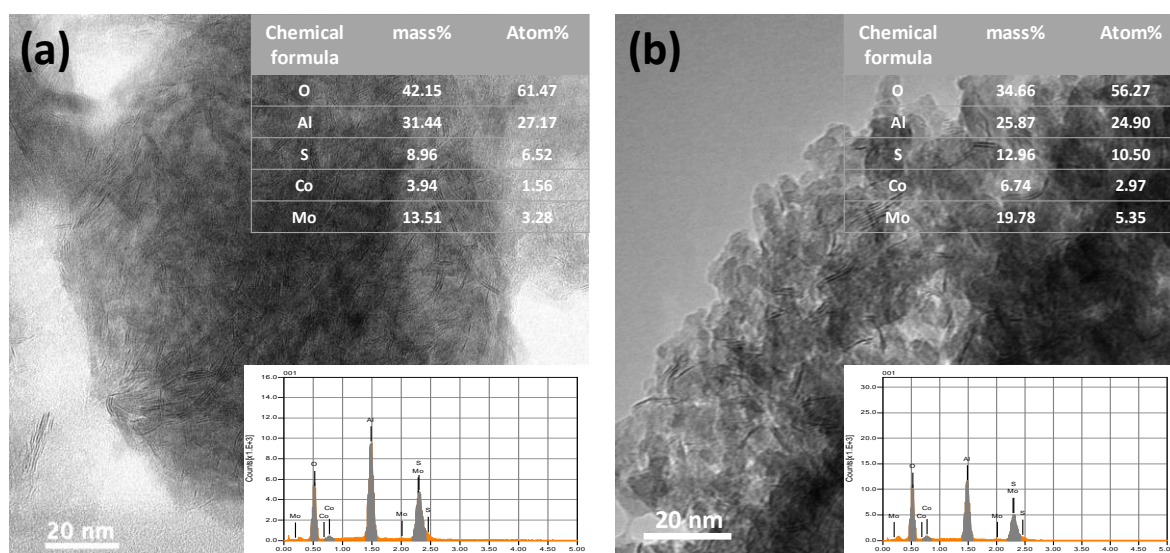

**Figure S1.** TEM images of the (a) CoMoS/US, (b) CoMoS/PS and EDS analysis of the catalysts (inset).

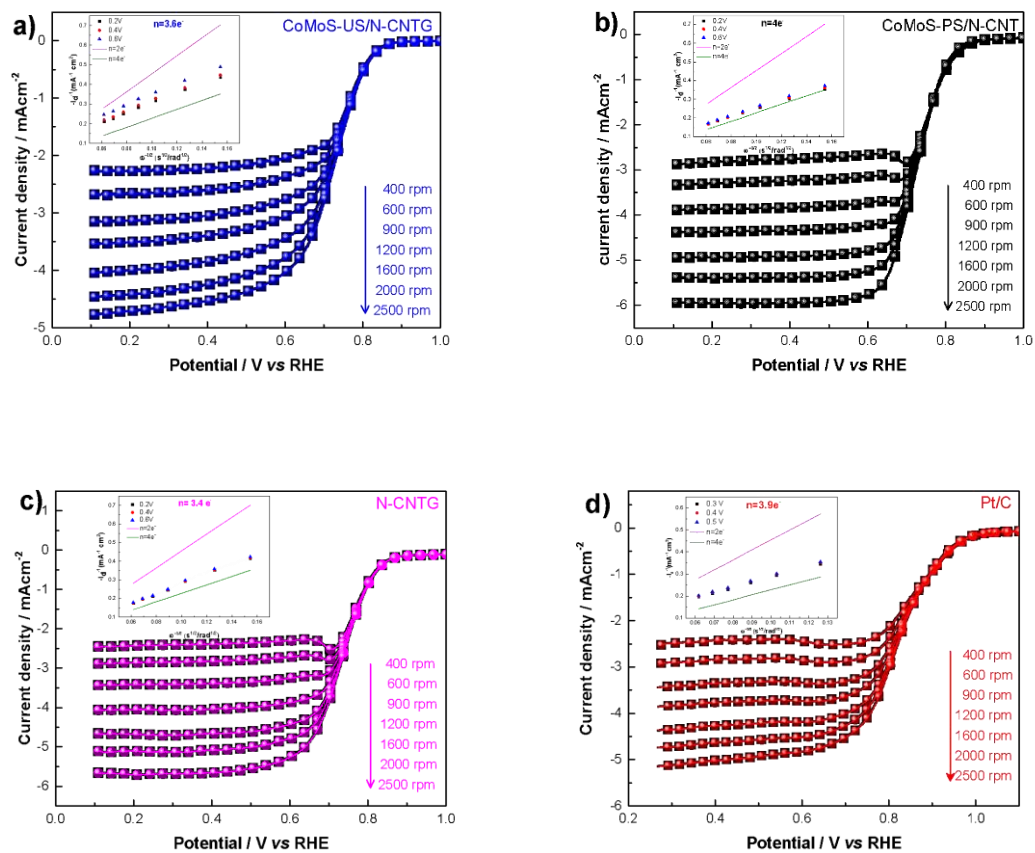

**Figure S2.** Linear scan voltammeteries and K-L plots (insets) of (a) CoMoS-US/N-CNTG, (b) CoMoS-PS/N-CNTG, (c) N-CNTG and (d) Benchmarked Pt/C.
